# Supplementary material
Source: publisher figshare collection journal article supplement (https://gsapubs.figshare.com/articles/dataset/_/12528224)
Supplement: Supplementary file 1 [file 1]

## Zircon Hf data - Clements et al., 2011

| EARLY OLIGOCENE FORMATIONS |             |                                   |           |                                   |                                   |          |            |                                     |                     |            |                            |                            |             |           |
|----------------------------|-------------|-----------------------------------|-----------|-----------------------------------|-----------------------------------|----------|------------|-------------------------------------|---------------------|------------|----------------------------|----------------------------|-------------|-----------|
| Cijengkol Fm.              |             |                                   |           |                                   |                                   |          |            |                                     |                     |            |                            |                            |             |           |
| Sample                     | Analysi     | $^{176}\text{Hf}/^{177}\text{Hf}$ | 1 S.D.    | $^{176}\text{Lu}/^{177}\text{Hf}$ | $^{176}\text{Yb}/^{177}\text{Hf}$ | U/Pb AGE | Population | $^{176}\text{Hf}/^{177}\text{Hf}_i$ | $\epsilon\text{Hf}$ | 1 $\sigma$ | $T_{\text{DM}}(\text{Ga})$ | $T_{\text{DM}}^{\text{C}}$ | Hf Chur (t) | Hf DM (t) |
| 13B                        | 2191CIJ-50  | 0.283016                          | 0.000011  | 0.00289706                        | 0.106084                          | 49       |            | 0.283013                            | 9.6                 | 0.4        | 0.4                        | 0.5                        | 0.282742    | 0.283216  |
| 13B                        | 2191CIJ-23  | 0.283101                          | 0.00001   | 0.00200014                        | 0.0628161                         | 91       | G          | 0.283098                            | 13.5                | 0.4        | 0.2                        | 0.3                        | 0.282716    | 0.283186  |
| 13B                        | 2191CIJ-48  | 0.282985                          | 0.0000093 | 0.0011456                         | 0.0415023                         | 100      | G          | 0.282983                            | 9.7                 | 0.3        | 0.4                        | 0.5                        | 0.282710    | 0.283179  |
| 13B                        | 2191CIJ-16  | 0.282922                          | 0.000009  | 0.000929662                       | 0.033773                          | 103      | G          | 0.282920                            | 7.5                 | 0.3        | 0.5                        | 0.7                        | 0.282708    | 0.283177  |
| 13B                        | 2191CIJ-118 | 0.283082                          | 0.00001   | 0.00115422                        | 0.0295898                         | 107      | G          | 0.283080                            | 13.2                | 0.4        | 0.2                        | 0.3                        | 0.282706    | 0.283175  |
| 13B                        | 2191CIJ-38  | 0.282918                          | 0.000011  | 0.00126617                        | 0.0424054                         | 121      | G          | 0.282915                            | 7.7                 | 0.4        | 0.5                        | 0.7                        | 0.282697    | 0.283164  |
| 13B                        | 2191CIJ-107 | 0.282948                          | 0.000011  | 0.00158436                        | 0.0621393                         | 124      | G          | 0.282944                            | 8.8                 | 0.4        | 0.4                        | 0.6                        | 0.282695    | 0.283162  |
| 13B                        | 2191CIJ-71  | 0.283113                          | 0.0000099 | 0.00132494                        | 0.0463769                         | 145      | F          | 0.283109                            | 15.1                | 0.3        | 0.2                        | 0.2                        | 0.282682    | 0.283147  |
| 13B                        | 2191CIJ-81  | 0.283108                          | 0.000016  | 0.00110225                        | 0.0369782                         | 151      | F          | 0.283105                            | 15.1                | 0.6        | 0.2                        | 0.2                        | 0.282679    | 0.283143  |
| 13B                        | 2191CIJ-46  | 0.282895                          | 0.0000099 | 0.00210525                        | 0.0753867                         | 168      | F          | 0.282888                            | 7.8                 | 0.3        | 0.5                        | 0.7                        | 0.282668    | 0.283131  |
| 13B                        | 2191CIJ-102 | 0.282624                          | 0.000011  | 0.0010705                         | 0.036575                          | 180      | F          | 0.282620                            | -1.4                | 0.4        | 0.9                        | 1.3                        | 0.282660    | 0.283122  |
| 13B                        | 2191CIJ-100 | 0.28236                           | 0.0000086 | 0.00172025                        | 0.0701878                         | 222      | E          | 0.282353                            | -10.0               | 0.3        | 1.3                        | 1.9                        | 0.282634    | 0.283092  |
| 13B                        | 2191CIJ-73  | 0.282347                          | 0.00001   | 0.000766246                       | 0.0303293                         | 289      | E          | 0.282343                            | -8.8                | 0.4        | 1.3                        | 1.9                        | 0.282592    | 0.283043  |
| 13B                        | 2191CIJ-29  | 0.282395                          | 0.0000068 | 0.00126927                        | 0.0562846                         | 214      | E          | 0.282390                            | -8.8                | 0.2        | 1.2                        | 1.8                        | 0.282639    | 0.283097  |
| 13B                        | 2191CIJ-43  | 0.282368                          | 0.0000074 | 0.000969731                       | 0.0393473                         | 268      | E          | 0.282363                            | -8.6                | 0.3        | 1.2                        | 1.8                        | 0.282606    | 0.283059  |
| 13B                        | 2191CIJ-21  | 0.282414                          | 0.000009  | 0.00125894                        | 0.0476567                         | 206      | E          | 0.282409                            | -8.3                | 0.3        | 1.2                        | 1.8                        | 0.282644    | 0.283103  |
| 13B                        | 2191CIJ-106 | 0.282404                          | 0.0000088 | 0.00135883                        | 0.0533917                         | 229      | E          | 0.282398                            | -8.2                | 0.3        | 1.2                        | 1.8                        | 0.282630    | 0.283087  |
| 13B                        | 2191CIJ-117 | 0.282404                          | 0.0000077 | 0.000252328                       | 0.0098074                         | 222      | E          | 0.282403                            | -8.2                | 0.3        | 1.2                        | 1.8                        | 0.282634    | 0.283091  |
| 13B                        | 2191CIJ-32  | 0.282443                          | 0.0000089 | 0.00177243                        | 0.0752495                         | 215      | E          | 0.282436                            | -7.2                | 0.3        | 1.2                        | 1.7                        | 0.282639    | 0.283097  |
| 13B                        | 2191CIJ-67  | 0.282432                          | 0.000013  | 0.0015236                         | 0.059991                          | 232      | E          | 0.282425                            | -7.2                | 0.5        | 1.2                        | 1.7                        | 0.282628    | 0.283085  |
| 13B                        | 2191CIJ-12  | 0.282454                          | 0.000013  | 0.000584288                       | 0.023839                          | 204      | E          | 0.282452                            | -6.9                | 0.5        | 1.1                        | 1.7                        | 0.282646    | 0.283105  |
| 13B                        | 2191CIJ-61  | 0.28246                           | 0.00001   | 0.00114456                        | 0.0480739                         | 299      | E          | 0.282454                            | -4.7                | 0.4        | 1.1                        | 1.6                        | 0.282586    | 0.283036  |
| 13B                        | 2191CIJ-47  | 0.282532                          | 0.00001   | 0.00161075                        | 0.0700581                         | 219      | E          | 0.282525                            | -3.9                | 0.4        | 1.0                        | 1.5                        | 0.282636    | 0.283094  |
| 13B                        | 2191CIJ-51  | 0.28251                           | 0.00001   | 0.00122521                        | 0.0486952                         | 264      | E          | 0.282504                            | -3.7                | 0.4        | 1.1                        | 1.5                        | 0.282608    | 0.283061  |
| 13B                        | 2191CIJ-87  | 0.282605                          | 0.000012  | 0.000845395                       | 0.0338933                         | 218      | E          | 0.282602                            | -1.2                | 0.4        | 0.9                        | 1.3                        | 0.282637    | 0.283094  |
| 13B                        | 2191CIJ-74  | 0.282623                          | 0.0000087 | 0.000731603                       | 0.0306998                         | 207      | E          | 0.282620                            | -0.8                | 0.3        | 0.9                        | 1.3                        | 0.282644    | 0.283102  |
| 13B                        | 2191CIJ-108 | 0.282625                          | 0.0000099 | 0.000667385                       | 0.0254205                         | 219      | E          | 0.282622                            | -0.5                | 0.4        | 0.9                        | 1.3                        | 0.282636    | 0.283094  |
| 13B                        | 2191CIJ-113 | 0.282698                          | 0.000011  | 0.00105667                        | 0.0410199                         | 223      | E          | 0.282694                            | 2.1                 | 0.4        | 0.8                        | 1.1                        | 0.282634    | 0.283091  |
| 13B                        | 2191CIJ-97  | 0.28276                           | 0.0000075 | 0.00108465                        | 0.035575                          | 245      | E          | 0.282755                            | 4.8                 | 0.3        | 0.7                        | 1.0                        | 0.282620    | 0.283075  |
| 13B                        | 2191CIJ-15  | 0.282262                          | 0.000011  | 1.89661E-05                       | 0.000840624                       | 493      | C          | 0.282262                            | -7.2                | 0.4        | 1.4                        | 1.9                        | 0.282465    | 0.282896  |
| 13B                        | 2191CIJ-90  | 0.282152                          | 0.0000078 | 0.000399872                       | 0.0145137                         | 561      | C          | 0.282148                            | -9.7                | 0.3        | 1.5                        | 2.1                        | 0.282423    | 0.282847  |
| 13B                        | 2191CIJ-63  | 0.281709                          | 0.000013  | 0.000484003                       | 0.0204398                         | 601      | C          | 0.281704                            | -24.6               | 0.5        | 2.1                        | 3.1                        | 0.282398    | 0.282818  |
| 13B                        | 2191CIJ-78  | 0.282521                          | 0.0000095 | 0.0012501                         | 0.0472924                         | 770      | B          | 0.282503                            | 7.5                 | 0.3        | 1.0                        | 1.2                        | 0.282292    | 0.282695  |
| 13B                        | 2191CIJ-109 | 0.282193                          | 0.000006  | 0.0003148                         | 0.0124735                         | 917      | B          | 0.282188                            | -0.4                | 0.2        | 1.5                        | 1.8                        | 0.282199    | 0.282589  |
| 13B                        | 2191CIJ-112 | 0.281926                          | 0.00001   | 0.000328541                       | 0.0130047                         | 924      | B          | 0.281920                            | -9.7                | 0.4        | 1.8                        | 2.4                        | 0.282195    | 0.282583  |
| 13B                        | 2191CIJ-59  | 0.282016                          | 0.000012  | 0.00126088                        | 0.0481726                         | 958      | B          | 0.281993                            | -6.4                | 0.4        | 1.8                        | 2.2                        | 0.282174    | 0.282559  |
| 13B                        | 2191CIJ-57  | 0.281994                          | 0.000015  | 0.000683933                       | 0.0254489                         | 1029     | B          | 0.281981                            | -5.2                | 0.5        | 1.8                        | 2.2                        | 0.282129    | 0.282507  |
| 13B                        | 2191CIJ-62  | 0.282314                          | 0.0000087 | 0.0012899                         | 0.0538696                         | 1051     | B          | 0.282288                            | 6.1                 | 0.3        | 1.3                        | 1.5                        | 0.282115    | 0.282491  |
| 13B                        | 2191CIJ-110 | 0.281725                          | 0.0000081 | 0.000572378                       | 0.0227956                         | 1130     | B          | 0.281713                            | -12.5               | 0.3        | 2.1                        | 2.8                        | 0.282065    | 0.282433  |
| 13B                        | 2191CIJ-92  | 0.281186                          | 0.000015  | 0.000296689                       | 0.0123064                         | 2591     | A          | 0.281171                            | 1.5                 | 0.5        | 2.8                        | 3.0                        | 0.281128    | 0.281350  |
| Cikalong Fm.               |             |                                   |           |                                   |                                   |          |            |                                     |                     |            |                            |                            |             |           |
| Sample                     | Analysi     | $^{176}\text{Hf}/^{177}\text{Hf}$ | 1 S.D.    | $^{176}\text{Lu}/^{177}\text{Hf}$ | $^{176}\text{Yb}/^{177}\text{Hf}$ | U/Pb AGE | Population | $^{176}\text{Hf}/^{177}\text{Hf}_i$ | $\epsilon\text{Hf}$ | 1 $\sigma$ | $T_{\text{DM}}(\text{Ga})$ | $T_{\text{DM}}^{\text{C}}$ | Hf Chur (t) | Hf DM (t) |
| 22D                        | JBC2117-42  | 0.282953                          | 0.0000091 | 0.000787468                       | 0.0256402                         | 89       | G          | 0.282952                            | 8.3                 | 0.3        | 0.4                        | 0.6                        | 0.282717    | 0.283187  |
| 22D                        | JBC2117-58  | 0.283027                          | 0.0000093 | 0.00177311                        | 0.0925907                         | 108      | G          | 0.283023                            | 11.3                | 0.3        | 0.3                        | 0.5                        | 0.282705    | 0.283174  |
| 22D                        | JBC2117-9   | 0.282829                          | 0.0000091 | 0.00143358                        | 0.0512029                         | 108      | G          | 0.282826                            | 4.3                 | 0.3        | 0.6                        | 0.9                        | 0.282705    | 0.283174  |
| 22D                        | JBC2117-44  | 0.282874                          | 0.0000071 | 0.000961654                       | 0.0300496                         | 113      | G          | 0.282872                            | 6.0                 | 0.3        | 0.5                        | 0.8                        | 0.282702    | 0.283170  |
| 22D                        | JBC2117-56  | 0.283006                          | 0.000011  | 0.00188136                        | 0.0722171                         | 115      | G          | 0.283002                            | 10.7                | 0.4        | 0.4                        | 0.5                        | 0.282700    | 0.283168  |
| 22D                        | JBC2117-13  | 0.282346                          | 0.0000086 | 0.000934274                       | 0.0328459                         | 123      | G          | 0.282344                            | -12.5               | 0.3        | 1.3                        | 2.0                        | 0.282696    | 0.283163  |
| 22D                        | JBC2117-23  | 0.282909                          | 0.000013  | 0.0016002                         | 0.0633087                         | 150      | F          | 0.282905                            | 8.0                 | 0.5        | 0.5                        | 0.7                        | 0.282679    | 0.283144  |
| 22D                        | JBC2117-8   | 0.28299                           | 0.0000061 | 0.00248373                        | 0.0876952                         | 155      | F          | 0.282983                            | 10.8                | 0.2        | 0.4                        | 0.5                        | 0.282676    | 0.283140  |
| 22D                        | JBC2117-8A  | 0.28307                           | 0.00001   | 0.000860962                       | 0.0257533                         | 155      | F          | 0.283068                            | 13.8                | 0.4        | 0.3                        | 0.3                        | 0.282676    | 0.283140  |
| 22D                        | JBC2117-40  | 0.282952                          | 0.000016  | 0.000896166                       | 0.0322328                         | 183      | F          | 0.282949                            | 10.3                | 0.6        | 0.4                        | 0.6                        | 0.282658    | 0.283120  |
| 22D                        | JBC2117-31  | 0.282471                          | 0.000007  | 0.000473595                       | 0.0166547                         | 204      | E          | 0.282469                            | -6.2                | 0.2        | 1.1                        | 1.6                        | 0.282645    | 0.283105  |
| 22D                        | JBC2117-27  | 0.282472                          | 0.0000097 | 0.000515091                       | 0.0182823                         | 210      | E          | 0.282470                            | -6.1                | 0.3        | 1.1                        | 1.6                        | 0.282642    | 0.283101  |
| 22D                        | JBC2117-39  | 0.282433                          | 0.0000061 | 0.0013845                         | 0.0531813                         | 212      | E          | 0.282428                            | -7.5                | 0.2        | 1.2                        | 1.7                        | 0.282641    | 0.283099  |
| 22D                        | JBC2117-26  | 0.282662                          | 0.000011  | 0.00124745                        | 0.046287                          | 215      | E          | 0.282657                            | 0.6                 | 0.4        | 0.8                        | 1.2                        | 0.282639    | 0.283097  |
| 22D                        | JBC2117-11  | 0.282808                          | 0.0000073 | 0.000796255                       | 0.0253698                         | 231      | E          | 0.282805                            | 6.2                 | 0.3        | 0.6                        | 0.9                        | 0.282629    | 0.283085  |
| 22D                        | JBC2117-19  | 0.282855                          | 0.0000082 | 0.000582503                       | 0.0206839                         | 235      | E          | 0.282852                            | 8.0                 | 0.3        | 0.6                        | 0.8                        | 0.282626    | 0.283083  |
| 22D                        | JBC2117-46  | 0.282927                          | 0.0000071 | 0.000495473                       | 0.0168195                         | 235      | E          | 0.282925                            | 10.6                | 0.3        | 0.5                        | 0.6                        | 0.282626    | 0.283082  |
| 22D                        | JBC2117-10  | 0.282383                          | 0.0000082 | 0.00102861                        | 0.037647                          | 246      | E          | 0.282378                            | -8.5                | 0.3        | 1.2                        | 1.8                        | 0.282619    | 0.283074  |
| 22D                        | JBC2117-22  | 0.282202                          | 0.000014  | 0.00088799                        | 0.0380053                         | 263      | E          | 0.282198                            | -14.6               | 0.5        | 1.5                        | 2.2                        | 0.282609    | 0.283063  |
| 22D                        | JBC2117-82  | 0.282522                          | 0.0000066 | 0.00139704                        | 0.0561491                         | 274      | E          | 0.282515                            | -3.1                | 0.2        | 1.0                        | 1.5                        | 0.282602    | 0.283054  |
| 22D                        | JBC2117-24  | 0.282559                          | 0.0000096 | 0.000937293                       | 0.0341411                         | 346      | D          | 0.282553                            | -0.2                | 0.3        | 1.0                        | 1.4                        | 0.282557    | 0.283003  |
| 22D                        | JBC2117-60  | 0.282697                          | 0.00001   | 0.000585418                       | 0.0277036                         | 356      | D          | 0.282693                            | 5.0                 | 0.4        | 0.8                        | 1.0                        | 0.282551    | 0.282996  |

|     |             |          |           |             |            |      |   |          |       |     |     |     |          |          |
|-----|-------------|----------|-----------|-------------|------------|------|---|----------|-------|-----|-----|-----|----------|----------|
| 22D | JBC2117-64  | 0.2825   | 0.0000092 | 0.000708673 | 0.0317955  | 423  | D | 0.282494 | -0.5  | 0.3 | 1.1 | 1.5 | 0.282509 | 0.282947 |
| 22D | JBC2117-33  | 0.282077 | 0.000009  | 0.000443188 | 0.0179548  | 497  | C | 0.282073 | -13.8 | 0.3 | 1.6 | 2.3 | 0.282463 | 0.282894 |
| 22D | JBC2117-85  | 0.28218  | 0.0000089 | 0.00038899  | 0.0172952  | 528  | C | 0.282176 | -9.5  | 0.3 | 1.5 | 2.1 | 0.282444 | 0.282871 |
| 22D | JBC2117-30  | 0.282321 | 0.000016  | 3.47971E-05 | 0.00156127 | 533  | C | 0.282321 | -4.2  | 0.6 | 1.3 | 1.8 | 0.282440 | 0.282867 |
| 22D | JBC2117-51  | 0.281635 | 0.000025  | 0.00114372  | 0.062005   | 557  | C | 0.281623 | -28.4 | 0.9 | 2.3 | 3.3 | 0.282426 | 0.282850 |
| 22D | JBC2117-63  | 0.282325 | 0.00001   | 0.000202928 | 0.0108358  | 560  | C | 0.282323 | -3.6  | 0.4 | 1.3 | 1.7 | 0.282423 | 0.282848 |
| 22D | JBC2117-72  | 0.281611 | 0.00001   | 0.000168586 | 0.00843112 | 564  | C | 0.281609 | -28.7 | 0.4 | 2.3 | 3.3 | 0.282421 | 0.282845 |
| 22D | JBC2117-5   | 0.281694 | 0.000011  | 0.000479019 | 0.0182453  | 566  | C | 0.281689 | -25.9 | 0.4 | 2.2 | 3.1 | 0.282420 | 0.282844 |
| 22D | JBC2117-2   | 0.281781 | 0.00003   | 0.000879231 | 0.030993   | 600  | C | 0.281771 | -22.2 | 1.1 | 2.1 | 2.9 | 0.282399 | 0.282819 |
| 22D | JBC2117-81  | 0.282081 | 0.00001   | 0.00128329  | 0.0492517  | 603  | C | 0.282066 | -11.7 | 0.4 | 1.7 | 2.3 | 0.282396 | 0.282817 |
| 22D | JBC2117-50  | 0.281994 | 0.000013  | 0.000789266 | 0.0313777  | 605  | C | 0.281985 | -14.5 | 0.5 | 1.8 | 2.5 | 0.282395 | 0.282815 |
| 22D | JBC2117-37  | 0.28207  | 0.0000076 | 0.000788888 | 0.0295426  | 633  | C | 0.282061 | -11.2 | 0.3 | 1.7 | 2.3 | 0.282378 | 0.282795 |
| 22D | JBC2117-53  | 0.2821   | 0.00001   | 0.000148468 | 0.00731845 | 742  | B | 0.282098 | -7.5  | 0.4 | 1.6 | 2.1 | 0.282309 | 0.282716 |
| 22D | JBC2117-17  | 0.282177 | 0.000011  | 0.000632954 | 0.0234836  | 790  | B | 0.282168 | -3.9  | 0.4 | 1.5 | 2.0 | 0.282279 | 0.282681 |
| 22D | JBC2117-62  | 0.282207 | 0.0000098 | 0.000790391 | 0.0423955  | 808  | B | 0.282195 | -2.6  | 0.3 | 1.5 | 1.9 | 0.282268 | 0.282668 |
| 22D | JBC2117-38  | 0.282034 | 0.0000084 | 0.000918687 | 0.0362769  | 843  | B | 0.282019 | -8.0  | 0.3 | 1.7 | 2.3 | 0.282246 | 0.282642 |
| 22D | JBC2117-68  | 0.282364 | 0.000013  | 0.00115503  | 0.0544363  | 872  | B | 0.282345 | 4.1   | 0.5 | 1.3 | 1.5 | 0.282228 | 0.282622 |
| 22D | JBC2117-83  | 0.282302 | 0.000014  | 0.000606934 | 0.0256006  | 873  | B | 0.282292 | 2.3   | 0.5 | 1.3 | 1.6 | 0.282227 | 0.282621 |
| 22D | JBC2117-66  | 0.282519 | 0.0000089 | 0.000736664 | 0.0295986  | 874  | B | 0.282507 | 9.9   | 0.3 | 1.0 | 1.1 | 0.282227 | 0.282620 |
| 22D | JBC2117-57  | 0.282265 | 0.0000094 | 0.000564656 | 0.0257731  | 906  | B | 0.282255 | 1.7   | 0.3 | 1.4 | 1.7 | 0.282206 | 0.282597 |
| 22D | JBC2117-18  | 0.282444 | 0.0000082 | 0.00080849  | 0.0302483  | 912  | B | 0.282430 | 8.1   | 0.3 | 1.1 | 1.3 | 0.282202 | 0.282592 |
| 22D | JBC2117-71  | 0.282135 | 0.00001   | 0.000156302 | 0.0089216  | 965  | B | 0.282132 | -1.3  | 0.4 | 1.5 | 1.9 | 0.282169 | 0.282554 |
| 22D | JBC2117-79A | 0.281996 | 0.0000086 | 0.000707592 | 0.0295481  | 979  | B | 0.281983 | -6.3  | 0.3 | 1.8 | 2.2 | 0.282160 | 0.282543 |
| 22D | JBC2117-34  | 0.282387 | 0.0000095 | 0.000743761 | 0.0289545  | 995  | B | 0.282373 | 7.9   | 0.3 | 1.2 | 1.4 | 0.282150 | 0.282532 |
| 22D | JBC2117-73  | 0.282219 | 0.000012  | 0.00337211  | 0.15912    | 1122 | B | 0.282148 | 2.8   | 0.4 | 1.6 | 1.8 | 0.282070 | 0.282439 |
| 22D | JBC2117-12  | 0.281918 | 0.0000091 | 0.000782943 | 0.0295299  | 1159 | B | 0.281901 | -5.2  | 0.3 | 1.9 | 2.3 | 0.282047 | 0.282412 |
| 22D | JBC2117-4   | 0.281866 | 0.0000059 | 0.000758197 | 0.0297785  | 1232 | B | 0.281848 | -5.4  | 0.2 | 1.9 | 2.4 | 0.282001 | 0.282359 |
| 22D | JBC2117-43  | 0.282107 | 0.0000089 | 0.00102075  | 0.0374159  | 1253 | B | 0.282083 | 3.4   | 0.3 | 1.6 | 1.8 | 0.281987 | 0.282343 |
| 22D | JBC2117-25  | 0.282047 | 0.0000072 | 0.000452085 | 0.0166731  | 1322 |   | 0.282036 | 3.3   | 0.3 | 1.7 | 1.9 | 0.281943 | 0.282292 |
| 22D | JBC2117-77  | 0.281495 | 0.0000085 | 0.00137738  | 0.0638701  | 1331 |   | 0.281460 | -16.9 | 0.3 | 2.5 | 3.2 | 0.281938 | 0.282286 |
| 22D | JBC2117-54  | 0.28143  | 0.00001   | 0.00119716  | 0.0500099  | 1718 | A | 0.281391 | -10.7 | 0.4 | 2.6 | 3.1 | 0.281691 | 0.282001 |
| 22D | JBC2117-6   | 0.281653 | 0.0000078 | 0.00065664  | 0.0247886  | 1772 | A | 0.281631 | -0.9  | 0.3 | 2.2 | 2.5 | 0.281657 | 0.281961 |
| 22D | JBC2117-47  | 0.281695 | 0.000012  | 0.000655032 | 0.0249483  | 1778 | A | 0.281673 | 0.7   | 0.4 | 2.2 | 2.4 | 0.281652 | 0.281956 |
| 22D | JBC2117-75  | 0.281263 | 0.000011  | 0.000617959 | 0.0269616  | 2296 | A | 0.281236 | -3.0  | 0.4 | 2.7 | 3.1 | 0.281319 | 0.281571 |
| 22D | JBC2117-79  | 0.280921 | 0.000007  | 0.000380016 | 0.0160317  | 2463 | A | 0.280903 | -11.0 | 0.2 | 3.2 | 3.7 | 0.281212 | 0.281446 |

#### LATE EOCENE FORMATIONS

#### Bayah Fm.

| Sample | Analysi    | $^{176}\text{Hf}/^{177}\text{Hf}$ | 1 S.D.    | $^{176}\text{Lu}/^{177}\text{Hf}$ | $^{176}\text{Yb}/^{177}\text{Hf}$ | U/Pb AGE | Population | $^{176}\text{Hf}/^{177}\text{Hf}_{\text{c}}$ | $\epsilon\text{Hf}$ | 1 $\sigma$ | $T_{\text{DM}}(\text{Ga})$ | $T_{\text{DM}}^{\text{C}}$ | Hf Chur (t) | Hf DM (t) |
|--------|------------|-----------------------------------|-----------|-----------------------------------|-----------------------------------|----------|------------|----------------------------------------------|---------------------|------------|----------------------------|----------------------------|-------------|-----------|
| 2C     | JBC2137-42 | 0.282972                          | 0.000018  | 0.00158472                        | 0.086104                          | 81       | G          | 0.282970                                     | 8.8                 | 0.6        | 0.4                        | 0.6                        | 0.282722    | 0.283193  |
| 2C     | JBC2137-20 | 0.282702                          | 0.0000099 | 0.000452038                       | 0.0197245                         | 85       | G          | 0.282701                                     | -0.6                | 0.4        | 0.8                        | 1.2                        | 0.282719    | 0.283190  |
| 2C     | JBC2137-29 | 0.283017                          | 0.0000068 | 0.000524975                       | 0.0209336                         | 94       | G          | 0.283016                                     | 10.7                | 0.2        | 0.3                        | 0.5                        | 0.282714    | 0.283184  |
| 2C     | JBC2137-30 | 0.283056                          | 0.000012  | 0.00104677                        | 0.0483306                         | 97       | G          | 0.283054                                     | 12.1                | 0.4        | 0.3                        | 0.4                        | 0.282712    | 0.283182  |
| 2C     | JBC2137-68 | 0.282097                          | 0.0000088 | 0.00114088                        | 0.0472761                         | 102      | G          | 0.282095                                     | -21.7               | 0.3        | 1.6                        | 2.5                        | 0.282709    | 0.283178  |
| 2C     | JBC2137-53 | 0.283134                          | 0.000011  | 0.000830427                       | 0.037527                          | 118      | G          | 0.283132                                     | 15.3                | 0.4        | 0.2                        | 0.2                        | 0.282699    | 0.283166  |
| 2C     | JBC2137-75 | 0.28292                           | 0.0000098 | 0.000918301                       | 0.0381342                         | 130      | G          | 0.282918                                     | 8.0                 | 0.3        | 0.5                        | 0.7                        | 0.282692    | 0.283158  |
| 2C     | JBC2137-10 | 0.282575                          | 0.0000096 | 0.00146376                        | 0.0577091                         | 146      | F          | 0.282571                                     | -3.9                | 0.3        | 1.0                        | 1.4                        | 0.282681    | 0.283146  |
| 2C     | JBC2137-35 | 0.282533                          | 0.0000093 | 0.00126671                        | 0.0539469                         | 216      | E          | 0.282528                                     | -3.9                | 0.3        | 1.0                        | 1.5                        | 0.282638    | 0.283096  |
| 2C     | JBC2137-26 | 0.282554                          | 0.00001   | 0.000451796                       | 0.0214894                         | 222      | E          | 0.282552                                     | -2.9                | 0.4        | 1.0                        | 1.4                        | 0.282634    | 0.283092  |
| 2C     | JBC2137-24 | 0.282628                          | 0.000016  | 0.00136306                        | 0.0589911                         | 225      | E          | 0.282622                                     | -0.3                | 0.6        | 0.9                        | 1.3                        | 0.282632    | 0.283089  |
| 2C     | JBC2137-66 | 0.282417                          | 0.000013  | 0.00109724                        | 0.0467071                         | 235      | E          | 0.282412                                     | -7.6                | 0.5        | 1.2                        | 1.7                        | 0.282626    | 0.283083  |
| 2C     | JBC2137-58 | 0.282283                          | 0.000011  | 0.000990775                       | 0.0409014                         | 236      | E          | 0.282279                                     | -12.3               | 0.4        | 1.4                        | 2.0                        | 0.282626    | 0.283082  |
| 2C     | JBC2137-72 | 0.282744                          | 0.00001   | 0.00165423                        | 0.0684808                         | 264      | E          | 0.282736                                     | 4.5                 | 0.4        | 0.7                        | 1.0                        | 0.282608    | 0.283062  |
| 2C     | JBC2137-74 | 0.282796                          | 0.0000088 | 0.00101909                        | 0.0358921                         | 269      | E          | 0.282791                                     | 6.6                 | 0.3        | 0.6                        | 0.9                        | 0.282605    | 0.283058  |
| 2C     | JBC2137-76 | 0.2823                            | 0.000012  | 0.00127257                        | 0.0528641                         | 307      | D          | 0.282293                                     | -10.2               | 0.4        | 1.4                        | 2.0                        | 0.282581    | 0.283030  |
| 2C     | JBC2137-67 | 0.282532                          | 0.0000074 | 0.000802471                       | 0.0339113                         | 380      | D          | 0.282526                                     | -0.3                | 0.3        | 1.0                        | 1.4                        | 0.282536    | 0.282978  |
| 2C     | JBC2137-4  | 0.282145                          | 0.0000089 | 0.000175884                       | 0.00767451                        | 521      | C          | 0.282143                                     | -10.8               | 0.3        | 1.5                        | 2.2                        | 0.282448    | 0.282876  |
| 2C     | JBC2137-19 | 0.28132                           | 0.000014  | 0.000287762                       | 0.0161505                         | 524      | C          | 0.281317                                     | -40.0               | 0.5        | 2.6                        | 4.0                        | 0.282446    | 0.282874  |
| 2C     | JBC2137-40 | 0.282097                          | 0.000013  | 0.00033903                        | 0.0175021                         | 538      | C          | 0.282094                                     | -12.2               | 0.5        | 1.6                        | 2.3                        | 0.282437    | 0.282863  |
| 2C     | JBC2137-52 | 0.281901                          | 0.000011  | 0.000375295                       | 0.0183074                         | 548      | C          | 0.281897                                     | -18.9               | 0.4        | 1.9                        | 2.7                        | 0.282431    | 0.282856  |
| 2C     | JBC2137-48 | 0.281931                          | 0.000009  | 0.000394294                       | 0.018184                          | 559      | C          | 0.281927                                     | -17.6               | 0.3        | 1.8                        | 2.6                        | 0.282424    | 0.282849  |
| 2C     | JBC2137-14 | 0.281606                          | 0.00001   | 0.000319873                       | 0.0137918                         | 567      | C          | 0.281603                                     | -28.9               | 0.4        | 2.3                        | 3.3                        | 0.282419    | 0.282843  |
| 2C     | JBC2137-54 | 0.281742                          | 0.00001   | 0.000237709                       | 0.0112106                         | 624      | C          | 0.281739                                     | -22.8               | 0.4        | 2.1                        | 3.0                        | 0.282384    | 0.282802  |
| 2C     | JBC2137-39 | 0.282251                          | 0.000006  | 0.000417633                       | 0.0201859                         | 682      |            | 0.282246                                     | -3.6                | 0.2        | 1.4                        | 1.8                        | 0.282347    | 0.282760  |
| 2C     | JBC2137-83 | 0.282335                          | 0.0000076 | 0.000933386                       | 0.0345498                         | 723      | B          | 0.282322                                     | 0.0                 | 0.3        | 1.3                        | 1.6                        | 0.282321    | 0.282730  |
| 2C     | JBC2137-22 | 0.282153                          | 0.000011  | 0.000826938                       | 0.0382193                         | 772      | B          | 0.282141                                     | -5.3                | 0.4        | 1.5                        | 2.0                        | 0.282290    | 0.282694  |
| 2C     | JBC2137-81 | 0.281976                          | 0.000016  | 0.00208067                        | 0.0820708                         | 826      | B          | 0.281944                                     | -11.1               | 0.6        | 1.8                        | 2.4                        | 0.282257    | 0.282655  |
| 2C     | JBC2137-15 | 0.282364                          | 0.000011  | 0.000909654                       | 0.0406246                         | 866      | B          | 0.282349                                     | 4.2                 | 0.4        | 1.3                        | 1.5                        | 0.282231    | 0.282626  |
| 2C     | JBC2137-23 | 0.282396                          | 0.000016  | 0.00216131                        | 0.100223                          | 872      | B          | 0.282361                                     | 4.7                 | 0.6        | 1.2                        | 1.5                        | 0.282227    | 0.282621  |
| 2C     | JBC2137-82 | 0.281397                          | 0.000012  | 0.000497919                       | 0.0195355                         | 883      | B          | 0.281389                                     | -29.5               | 0.4        | 2.6                        | 3.6                        | 0.282220    | 0.282613  |
| 2C     | JBC2137-85 | 0.281993                          | 0.0000099 | 0.00055215                        | 0.0223775                         | 921      | B          | 0.281983                                     | -7.6                | 0.4        | 1.8                        | 2.3                        | 0.282197    | 0.282586  |
| 2C     | JBC2137-60 | 0.282276                          | 0.000011  | 0.000762751                       | 0.0330869                         | 956      | B          | 0.282262                                     | 3.1                 | 0.4        | 1.4                        | 1.6                        | 0.282175    | 0.282560  |
| 2C     | JBC2137-34 | 0.281718                          | 0.0000058 | 0.000900917                       | 0.0399194                         | 963      | B          | 0.281702                                     | -16.6               | 0.2        | 2.1                        | 2.9                        | 0.282171    | 0.282555  |
| 2C     | JBC2137-13 | 0.282121                          | 0.0000087 | 0.000150547                       | 0.00776023                        | 991      | B          | 0.282118                                     | -1.2                | 0.3        | 1.6                        | 1.9                        | 0.282152    | 0.282534  |

|    |            |          |           |             |            |      |   |          |      |     |     |      |          |          |
|----|------------|----------|-----------|-------------|------------|------|---|----------|------|-----|-----|------|----------|----------|
| 2C | JBC2137-43 | 0.282181 | 0.0000085 | 0.000494337 | 0.0242474  | 999  | B | 0.282172 | 0.9  | 0.3 | 1.5 | 1.8  | 0.282148 | 0.282529 |
| 2C | JBC2137-44 | 0.283137 | 0.000014  | 0.00138798  | 0.0678718  | 1125 | B | 0.283108 | 36.8 | 0.5 | 0.2 | -0.4 | 0.282068 | 0.282437 |
| 2C | JBC2137-55 | 0.281952 | 0.000012  | 0.000682394 | 0.0301306  | 1150 | B | 0.281937 | -4.1 | 0.4 | 1.8 | 2.2  | 0.282052 | 0.282419 |
| 2C | JBC2137-2  | 0.282199 | 0.0000073 | 0.000751958 | 0.0305071  | 1153 | B | 0.282183 | 4.7  | 0.3 | 1.5 | 1.7  | 0.282050 | 0.282416 |
| 2C | JBC2137-47 | 0.281863 | 0.000014  | 0.00030289  | 0.0145781  | 1154 | B | 0.281856 | -6.9 | 0.5 | 1.9 | 2.4  | 0.282050 | 0.282416 |
| 2C | JBC2137-25 | 0.282023 | 0.0000087 | 0.000269325 | 0.0129666  | 1159 | B | 0.282017 | -1.1 | 0.3 | 1.7 | 2.1  | 0.282047 | 0.282412 |
| 2C | JBC2137-5  | 0.281814 | 0.0000098 | 0.000619405 | 0.0258833  | 1178 | B | 0.281800 | -8.3 | 0.3 | 2.0 | 2.5  | 0.282034 | 0.282398 |
| 2C | JBC2137-87 | 0.281804 | 0.0000068 | 0.000364458 | 0.0159318  | 1205 | B | 0.281796 | -7.9 | 0.2 | 2.0 | 2.5  | 0.282017 | 0.282378 |
| 2C | JBC2137-9  | 0.281995 | 0.0000078 | 0.000720096 | 0.032247   | 1588 |   | 0.281973 | 7.1  | 0.3 | 1.8 | 1.9  | 0.281774 | 0.282097 |
| 2C | JBC2137-57 | 0.281595 | 0.0000072 | 0.00122554  | 0.0511192  | 1757 | A | 0.281554 | -4.0 | 0.3 | 2.3 | 2.7  | 0.281666 | 0.281972 |
| 2C | JBC2137-79 | 0.281669 | 0.0000073 | 0.000763918 | 0.0300811  | 1762 | A | 0.281643 | -0.7 | 0.3 | 2.2 | 2.5  | 0.281663 | 0.281968 |
| 2C | JBC2137-36 | 0.281619 | 0.000015  | 0.000198985 | 0.00909833 | 1796 | A | 0.281612 | -1.0 | 0.5 | 2.2 | 2.5  | 0.281641 | 0.281943 |
| 2C | JBC2137-78 | 0.28157  | 0.00001   | 0.000321588 | 0.0138268  | 1849 | A | 0.281559 | -1.7 | 0.4 | 2.3 | 2.6  | 0.281607 | 0.281904 |
| 2C | JBC2137-33 | 0.281452 | 0.0000084 | 0.000542173 | 0.0248986  | 1869 | A | 0.281433 | -5.7 | 0.3 | 2.5 | 2.9  | 0.281595 | 0.281889 |
| 2C | JBC2137-71 | 0.281491 | 0.0000087 | 0.000701047 | 0.0306173  | 1894 | A | 0.281466 | -4.0 | 0.3 | 2.4 | 2.8  | 0.281578 | 0.281870 |
| 2C | JBC2137-73 | 0.281463 | 0.0000078 | 0.000707156 | 0.0297856  | 1964 | A | 0.281437 | -3.4 | 0.3 | 2.5 | 2.8  | 0.281533 | 0.281818 |
| 2C | JBC2137-27 | 0.281294 | 0.000018  | 0.00118187  | 0.0480431  | 2337 | A | 0.281241 | -1.8 | 0.6 | 2.7 | 3.0  | 0.281293 | 0.281541 |
| 2C | JBC2137-46 | 0.281085 | 0.0000089 | 7.99327E-05 | 0.00459172 | 2466 | A | 0.281081 | -4.6 | 0.3 | 2.9 | 3.3  | 0.281209 | 0.281443 |

#### Bayah Fm.

| Sample | Analysi    | $^{176}\text{Hf}/^{177}\text{Hf}$ | 1 S.D.    | $^{176}\text{Lu}/^{177}\text{Hf}$ | $^{176}\text{Yb}/^{177}\text{Hf}$ | U/Pb AGE | Population | $^{176}\text{Hf}/^{177}\text{Hf}_i$ | $\epsilon\text{Hf}$ | 1 $\sigma$ | $T_{\text{DM}}(\text{Ga})$ | $T_{\text{DM}}^{\text{C}}$ | Hf Chur (t) | Hf DM (t) |
|--------|------------|-----------------------------------|-----------|-----------------------------------|-----------------------------------|----------|------------|-------------------------------------|---------------------|------------|----------------------------|----------------------------|-------------|-----------|
| 4B     | JBC2187-54 | 0.282937                          | 0.0000077 | 0.00150306                        | 0.0538098                         | 75       | G          | 0.282935                            | 7.4                 | 0.3        | 0.5                        | 0.7                        | 0.282725    | 0.283197  |
| 4B     | JBC2187-65 | 0.283003                          | 0.000012  | 0.000654845                       | 0.0216374                         | 79       | G          | 0.283002                            | 9.9                 | 0.4        | 0.3                        | 0.5                        | 0.282723    | 0.283194  |
| 4B     | JBC2187-63 | 0.282836                          | 0.00001   | 0.000816997                       | 0.0241857                         | 80       | G          | 0.282835                            | 4.0                 | 0.4        | 0.6                        | 0.9                        | 0.282722    | 0.283194  |
| 4B     | JBC2187-63 | 0.282693                          | 0.0000095 | 0.000546638                       | 0.0175745                         | 81       | G          | 0.282692                            | -1.1                | 0.3        | 0.8                        | 1.2                        | 0.282722    | 0.283193  |
| 4B     | JBC2187-52 | 0.282946                          | 0.000011  | 0.000471645                       | 0.0170001                         | 88       | G          | 0.282945                            | 8.0                 | 0.4        | 0.4                        | 0.6                        | 0.282718    | 0.283188  |
| 4B     | JBC2187-62 | 0.282836                          | 0.00001   | 0.000816997                       | 0.0241857                         | 96       | G          | 0.282835                            | 4.3                 | 0.4        | 0.6                        | 0.9                        | 0.282712    | 0.283182  |
| 4B     | JBC2187-48 | 0.282969                          | 0.0000096 | 0.000941017                       | 0.0352889                         | 98       | G          | 0.282967                            | 9.0                 | 0.3        | 0.4                        | 0.6                        | 0.282712    | 0.283181  |
| 4B     | JBC2187-26 | 0.283122                          | 0.0000089 | 0.000683367                       | 0.0233136                         | 98       | G          | 0.283121                            | 14.5                | 0.3        | 0.2                        | 0.2                        | 0.282711    | 0.283181  |
| 4B     | JBC2187-21 | 0.283007                          | 0.00001   | 0.001576                          | 0.0453494                         | 103      | G          | 0.283004                            | 10.5                | 0.4        | 0.4                        | 0.5                        | 0.282708    | 0.283177  |
| 4B     | JBC2187-44 | 0.283098                          | 0.000009  | 0.000756809                       | 0.0259914                         | 104      | G          | 0.283097                            | 13.8                | 0.3        | 0.2                        | 0.3                        | 0.282708    | 0.283177  |
| 4B     | JBC2187-50 | 0.282927                          | 0.0000083 | 0.000597355                       | 0.023527                          | 108      | G          | 0.282926                            | 7.8                 | 0.3        | 0.5                        | 0.7                        | 0.282705    | 0.283173  |
| 4B     | JBC2187-46 | 0.28303                           | 0.000011  | 0.00161806                        | 0.0539613                         | 124      | G          | 0.283026                            | 11.7                | 0.4        | 0.3                        | 0.4                        | 0.282695    | 0.283162  |
| 4B     | JBC2187-17 | 0.282926                          | 0.0000077 | 0.000692808                       | 0.0258496                         | 127      | G          | 0.282924                            | 8.2                 | 0.3        | 0.5                        | 0.7                        | 0.282693    | 0.283160  |
| 4B     | JBC2187-56 | 0.282734                          | 0.0000076 | 0.00145934                        | 0.0588612                         | 150      | F          | 0.282730                            | 1.8                 | 0.3        | 0.7                        | 1.1                        | 0.282679    | 0.283144  |
| 4B     | JBC2187-34 | 0.282731                          | 0.000016  | 0.00202845                        | 0.0757482                         | 151      | F          | 0.282725                            | 1.7                 | 0.6        | 0.8                        | 1.1                        | 0.282678    | 0.283143  |
| 4B     | JBC2187-31 | 0.282926                          | 0.000011  | 0.000985002                       | 0.0293311                         | 199      | F          | 0.282922                            | 9.7                 | 0.4        | 0.5                        | 0.6                        | 0.282648    | 0.283108  |
| 4B     | JBC2187-24 | 0.28264                           | 0.0000085 | 0.00141239                        | 0.0526327                         | 201      | E          | 0.282635                            | -0.4                | 0.3        | 0.9                        | 1.3                        | 0.282647    | 0.283107  |
| 4B     | JBC2187-51 | 0.282906                          | 0.0000079 | 0.00159305                        | 0.0591313                         | 202      | E          | 0.282900                            | 9.0                 | 0.3        | 0.5                        | 0.7                        | 0.282647    | 0.283106  |
| 4B     | JBC2187-16 | 0.282515                          | 0.000007  | 0.000524743                       | 0.0203891                         | 209      | E          | 0.282513                            | -4.6                | 0.2        | 1.0                        | 1.5                        | 0.282642    | 0.283101  |
| 4B     | JBC2187-33 | 0.282685                          | 0.0000099 | 0.00059884                        | 0.0218787                         | 212      | E          | 0.282683                            | 1.5                 | 0.4        | 0.8                        | 1.2                        | 0.282641    | 0.283099  |
| 4B     | JBC2187-15 | 0.282854                          | 0.0000089 | 0.00107473                        | 0.0369209                         | 225      | E          | 0.282849                            | 7.7                 | 0.3        | 0.6                        | 0.8                        | 0.282632    | 0.283089  |
| 4B     | JBC2187-13 | 0.282634                          | 0.0000059 | 0.000757188                       | 0.0274483                         | 229      | E          | 0.282631                            | 0.0                 | 0.2        | 0.9                        | 1.3                        | 0.282630    | 0.283087  |
| 4B     | JBC2187-14 | 0.282571                          | 0.0000075 | 0.00110644                        | 0.0472499                         | 233      | E          | 0.282566                            | -2.2                | 0.3        | 1.0                        | 1.4                        | 0.282627    | 0.283084  |
| 4B     | JBC2187-22 | 0.282935                          | 0.000011  | 0.000925718                       | 0.0319322                         | 240      | E          | 0.282931                            | 10.9                | 0.4        | 0.4                        | 0.6                        | 0.282623    | 0.283079  |
| 4B     | JBC2187-66 | 0.282978                          | 0.000011  | 0.000621997                       | 0.0202613                         | 247      | E          | 0.282975                            | 12.6                | 0.4        | 0.4                        | 0.5                        | 0.282619    | 0.283074  |
| 4B     | JBC2187-27 | 0.282695                          | 0.0000081 | 0.00144877                        | 0.0470473                         | 262      | E          | 0.282688                            | 2.8                 | 0.3        | 0.8                        | 1.1                        | 0.282609    | 0.283063  |
| 4B     | JBC2187-32 | 0.282369                          | 0.0000082 | 0.000800301                       | 0.0287006                         | 283      | E          | 0.282365                            | -8.2                | 0.3        | 1.2                        | 1.8                        | 0.282596    | 0.283048  |
| 4B     | JBC2187-45 | 0.282825                          | 0.0000076 | 0.000540615                       | 0.0183408                         | 312      | D          | 0.282822                            | 8.6                 | 0.3        | 0.6                        | 0.8                        | 0.282578    | 0.283027  |
| 4B     | JBC2187-35 | 0.282194                          | 0.0000071 | 0.000752839                       | 0.0291246                         | 479      | C          | 0.282187                            | -10.1               | 0.3        | 1.5                        | 2.1                        | 0.282474    | 0.282906  |
| 4B     | JBC2187-30 | 0.282049                          | 0.0000081 | 0.000633725                       | 0.0216816                         | 510      | C          | 0.282043                            | -14.6               | 0.3        | 1.7                        | 2.4                        | 0.282455    | 0.282884  |
| 4B     | JBC2187-41 | 0.281988                          | 0.000006  | 0.000374003                       | 0.0144965                         | 515      | C          | 0.281984                            | -16.5               | 0.2        | 1.8                        | 2.5                        | 0.282452    | 0.282881  |
| 4B     | JBC2187-23 | 0.281988                          | 0.0000069 | 0.00037681                        | 0.0138512                         | 547      | C          | 0.281984                            | -15.9               | 0.2        | 1.8                        | 2.5                        | 0.282432    | 0.282858  |
| 4B     | JBC2187-40 | 0.282095                          | 0.0000098 | 2.49821E-05                       | 0.00112251                        | 603      | C          | 0.282095                            | -10.7               | 0.3        | 1.6                        | 2.2                        | 0.282396    | 0.282816  |
| 4B     | JBC2187-43 | 0.282096                          | 0.0000072 | 0.000247                          | 0.00905991                        | 606      | C          | 0.282093                            | -10.7               | 0.3        | 1.6                        | 2.2                        | 0.282395    | 0.282815  |
| 4B     | JBC2187-10 | 0.281993                          | 0.0000092 | 0.000677172                       | 0.0275806                         | 857      | B          | 0.281982                            | -9.0                | 0.3        | 1.8                        | 2.3                        | 0.282237    | 0.282632  |
| 4B     | JBC2187-58 | 0.282271                          | 0.00001   | 0.000616046                       | 0.0244891                         | 882      | B          | 0.282261                            | 1.4                 | 0.4        | 1.4                        | 1.7                        | 0.282221    | 0.282614  |
| 4B     | JBC2187-19 | 0.28213                           | 0.000008  | 0.00106104                        | 0.0419511                         | 1129     | B          | 0.282107                            | 1.5                 | 0.3        | 1.6                        | 1.9                        | 0.282065    | 0.282434  |
| 4B     | JBC2187-39 | 0.281605                          | 0.0000089 | 0.00107431                        | 0.0400858                         | 1263     | B          | 0.281579                            | -14.2               | 0.3        | 2.3                        | 3.0                        | 0.281980    | 0.282336  |
| 4B     | JBC2187-64 | 0.282119                          | 0.0000082 | 0.000695368                       | 0.0253349                         | 1263     | B          | 0.282102                            | 4.3                 | 0.3        | 1.6                        | 1.8                        | 0.281980    | 0.282336  |
| 4B     | JBC2187-5  | 0.280872                          | 0.0000082 | 0.000595767                       | 0.0223455                         | 2217     | A          | 0.280847                            | -18.6               | 0.3        | 3.3                        | 4.0                        | 0.281371    | 0.281630  |

#### MIDDLE EOCENE FORMATIONS

#### Ciemas Fm.

| Sample | Analysi    | $^{176}\text{Hf}/^{177}\text{Hf}$ | 1 S.D.    | $^{176}\text{Lu}/^{177}\text{Hf}$ | $^{176}\text{Yb}/^{177}\text{Hf}$ | U/Pb AGE | Population | $^{176}\text{Hf}/^{177}\text{Hf}_i$ | $\epsilon\text{Hf}$ | 1 $\sigma$ | $T_{\text{DM}}(\text{Ga})$ | $T_{\text{DM}}^{\text{C}}$ | Hf Chur (t) | Hf DM (t) |
|--------|------------|-----------------------------------|-----------|-----------------------------------|-----------------------------------|----------|------------|-------------------------------------|---------------------|------------|----------------------------|----------------------------|-------------|-----------|
| 8A     | JBC2259-50 | 0.283141                          | 0.0000096 | 0.00430528                        | 0.436512                          |          |            |                                     |                     |            |                            |                            |             |           |
| 8A     | JBC2259-12 | 0.28278                           | 0.00002   | 0.00108203                        | 0.319546                          |          |            |                                     |                     |            |                            |                            |             |           |
| 8A     | JBC2259-59 | 0.282865                          | 0.000018  | 0.00161811                        | 0.339713                          |          |            |                                     |                     |            |                            |                            |             |           |
| 8A     | JBC2259-09 | 0.283056                          | 0.000009  | 0.00174796                        | 0.345134                          |          |            |                                     |                     |            |                            |                            |             |           |
| 8A     | JBC2259-67 | 0.282638                          | 0.0000083 | 0.00128136                        | 0.33255                           |          |            |                                     |                     |            |                            |                            |             |           |
| 8A     | JBC2259-81 | 0.283213                          | 0.0000067 | 0.0029839                         | 0.399521                          | 46       | I          | 0.283210                            | 16.5                | 0.2        | 0.1                        | 0.1                        | 0.282743    | 0.283218  |
| 8A     | JBC2259-64 | 0.282383                          | 0.0000081 | 0.00108673                        | 0.32884                           | 214      | E          | 0.282379                            | -9.2                | 0.3        | 1.2                        | 1.8                        | 0.282639    | 0.283097  |
| 8A     | JBC2259-16 | 0.282312                          | 0.000022  | 0.00169646                        | 0.352276                          | 214      | E          | 0.282305                            | -11.8               | 0.8        | 1.4                        | 2.0                        | 0.282639    | 0.283097  |
| 8A     | JBC2259-21 | 0.28243                           | 0.0000086 | 0.00104599                        | 0.32666                           | 227      | E          | 0.282426                            | -7.3                | 0.3        | 1.2                        | 1.7                        | 0.282631    | 0.283088  |

|    |            |          |           |             |          |      |   |          |       |     |     |     |          |          |
|----|------------|----------|-----------|-------------|----------|------|---|----------|-------|-----|-----|-----|----------|----------|
| 8A | JBC2259-08 | 0.282489 | 0.0000086 | 0.00132849  | 0.338062 | 241  | E | 0.282483 | -4.9  | 0.3 | 1.1 | 1.6 | 0.282623 | 0.283078 |
| 8A | JBC2259-72 | 0.282482 | 0.0000091 | 0.000376504 | 0.297567 | 245  | E | 0.282480 | -4.9  | 0.3 | 1.1 | 1.6 | 0.282620 | 0.283075 |
| 8A | JBC2259-44 | 0.283082 | 0.000016  | 0.000833067 | 0.318901 | 257  | E | 0.283078 | 16.5  | 0.6 | 0.2 | 0.2 | 0.282612 | 0.283066 |
| 8A | JBC2259-23 | 0.282221 | 0.000015  | 0.000529616 | 0.30472  | 261  | E | 0.282218 | -13.8 | 0.5 | 1.4 | 2.2 | 0.282610 | 0.283063 |
| 8A | JBC2259-63 | 0.282594 | 0.0000071 | 0.00123028  | 0.336703 | 315  | D | 0.282587 | 0.4   | 0.3 | 0.9 | 1.3 | 0.282576 | 0.283024 |
| 8A | JBC2259-62 | 0.282924 | 0.000013  | 0.00105329  | 0.325075 | 339  | D | 0.282917 | 12.6  | 0.5 | 0.5 | 0.5 | 0.282562 | 0.283008 |
| 8A | JBC2259-71 | 0.282238 | 0.000014  | 0.000818017 | 0.310181 | 422  | D | 0.282232 | -9.8  | 0.5 | 1.4 | 2.0 | 0.282510 | 0.282948 |
| 8A | JBC2259-69 | 0.281913 | 0.0000086 | 0.000466797 | 0.30104  | 480  | C | 0.281909 | -20.0 | 0.3 | 1.9 | 2.7 | 0.282473 | 0.282906 |
| 8A | JBC2259-41 | 0.28231  | 0.000018  | 0.00167757  | 0.354229 | 512  | C | 0.282294 | -5.7  | 0.6 | 1.4 | 1.8 | 0.282454 | 0.282883 |
| 8A | JBC2259-20 | 0.282406 | 0.0000071 | 0.00126103  | 0.332122 | 522  | C | 0.282394 | -1.9  | 0.3 | 1.2 | 1.6 | 0.282447 | 0.282875 |
| 8A | JBC2259-10 | 0.282149 | 0.00001   | 0.000357507 | 0.298412 | 543  | C | 0.282145 | -10.2 | 0.4 | 1.5 | 2.2 | 0.282434 | 0.282861 |
| 8A | JBC2259-80 | 0.281672 | 0.0000094 | 0.000298449 | 0.293679 | 547  | C | 0.281669 | -27.0 | 0.3 | 2.2 | 3.2 | 0.282432 | 0.282857 |
| 8A | JBC2259-17 | 0.282497 | 0.000015  | 0.000371368 | 0.297267 | 569  | C | 0.282493 | 2.7   | 0.5 | 1.1 | 1.4 | 0.282418 | 0.282841 |
| 8A | JBC2259-73 | 0.282319 | 0.000008  | 0.000430901 | 0.301552 | 573  | C | 0.282314 | -3.6  | 0.3 | 1.3 | 1.8 | 0.282415 | 0.282839 |
| 8A | JBC2259-61 | 0.28258  | 0.000011  | 0.00102928  | 0.329558 | 581  | C | 0.282569 | 5.6   | 0.4 | 1.0 | 1.2 | 0.282410 | 0.282832 |
| 8A | JBC2259-52 | 0.282237 | 0.000012  | 0.000940883 | 0.320514 | 608  | C | 0.282226 | -5.9  | 0.4 | 1.4 | 1.9 | 0.282394 | 0.282813 |
| 8A | JBC2259-39 | 0.282309 | 0.00001   | 0.000742066 | 0.313986 | 670  |   | 0.282300 | -1.9  | 0.4 | 1.3 | 1.7 | 0.282355 | 0.282768 |
| 8A | JBC2259-22 | 0.282246 | 0.000011  | 0.000304101 | 0.295976 | 708  |   | 0.282242 | -3.1  | 0.4 | 1.4 | 1.8 | 0.282331 | 0.282740 |
| 8A | JBC2259-43 | 0.282393 | 0.000019  | 0.000682771 | 0.312632 | 715  |   | 0.282384 | 2.0   | 0.7 | 1.2 | 1.5 | 0.282326 | 0.282735 |
| 8A | JBC2259-78 | 0.282369 | 0.0000083 | 0.00192481  | 0.367961 | 716  |   | 0.282343 | 0.6   | 0.3 | 1.3 | 1.6 | 0.282326 | 0.282735 |
| 8A | JBC2259-11 | 0.282556 | 0.000017  | 0.000994236 | 0.327227 | 752  | B | 0.282542 | 8.5   | 0.6 | 1.0 | 1.1 | 0.282303 | 0.282708 |
| 8A | JBC2259-02 | 0.282141 | 0.0000093 | 5.84193E-05 | 0.284933 | 771  | B | 0.282140 | -5.3  | 0.3 | 1.5 | 2.0 | 0.282291 | 0.282695 |
| 8A | JBC2259-86 | 0.28188  | 0.00001   | 0.000572399 | 0.307589 | 784  | B | 0.281872 | -14.6 | 0.4 | 1.9 | 2.6 | 0.282283 | 0.282685 |
| 8A | JBC2259-76 | 0.282831 | 0.000009  | 0.00176441  | 0.358337 | 786  | B | 0.282805 | 18.5  | 0.3 | 0.6 | 0.5 | 0.282282 | 0.282684 |
| 8A | JBC2259-01 | 0.282162 | 0.000016  | 0.000321699 | 0.295511 | 868  | B | 0.282157 | -2.6  | 0.6 | 1.5 | 1.9 | 0.282230 | 0.282624 |
| 8A | JBC2259-82 | 0.281651 | 0.000008  | 0.000480309 | 0.302051 | 885  | B | 0.281643 | -20.4 | 0.3 | 2.2 | 3.1 | 0.282220 | 0.282612 |
| 8A | JBC2259-84 | 0.282058 | 0.0000085 | 0.00161519  | 0.360428 | 915  | B | 0.282030 | -6.0  | 0.3 | 1.7 | 2.2 | 0.282201 | 0.282590 |
| 8A | JBC2259-83 | 0.281881 | 0.000016  | 0.000960165 | 0.320681 | 949  | B | 0.281864 | -11.2 | 0.6 | 1.9 | 2.5 | 0.282179 | 0.282566 |
| 8A | JBC2259-85 | 0.282055 | 0.00001   | 0.000506453 | 0.304334 | 956  | B | 0.282046 | -4.6  | 0.4 | 1.7 | 2.1 | 0.282175 | 0.282561 |
| 8A | JBC2259-37 | 0.282117 | 0.000016  | 0.000897159 | 0.323233 | 1000 | B | 0.282100 | -1.7  | 0.6 | 1.6 | 2.0 | 0.282147 | 0.282528 |
| 8A | JBC2259-32 | 0.282191 | 0.000009  | 0.000469548 | 0.302122 | 1210 | B | 0.282180 | 5.9   | 0.3 | 1.5 | 1.7 | 0.282014 | 0.282375 |
| 8A | JBC2259-19 | 0.281831 | 0.000011  | 0.000446697 | 0.300759 | 1240 | B | 0.281821 | -6.2  | 0.4 | 2.0 | 2.4 | 0.281995 | 0.282353 |
| 8A | JBC2259-40 | 0.281847 | 0.0000091 | 0.000612132 | 0.308266 | 1291 | B | 0.281832 | -4.6  | 0.3 | 2.0 | 2.4 | 0.281963 | 0.282315 |
| 8A | JBC2259-42 | 0.281897 | 0.000024  | 0.000396901 | 0.30166  | 1354 |   | 0.281887 | -1.3  | 0.9 | 1.9 | 2.2 | 0.281923 | 0.282269 |
| 8A | JBC2259-34 | 0.282113 | 0.0000093 | 0.000654269 | 0.310246 | 1390 |   | 0.282096 | 6.9   | 0.3 | 1.6 | 1.7 | 0.281900 | 0.282243 |
| 8A | JBC2259-75 | 0.282307 | 0.0000082 | 0.000593335 | 0.304406 | 1474 |   | 0.282290 | 15.7  | 0.3 | 1.3 | 1.2 | 0.281847 | 0.282181 |
| 8A | JBC2259-35 | 0.28156  | 0.000017  | 0.000591337 | 0.311252 | 1496 |   | 0.281543 | -10.3 | 0.6 | 2.3 | 2.9 | 0.281833 | 0.282165 |
| 8A | JBC2259-04 | 0.281925 | 0.0000078 | 0.000150146 | 0.288148 | 1501 |   | 0.281921 | 3.2   | 0.3 | 1.8 | 2.0 | 0.281829 | 0.282161 |
| 8A | JBC2259-66 | 0.281685 | 0.0000066 | 0.000648309 | 0.309094 | 1635 |   | 0.281665 | -2.8  | 0.2 | 2.2 | 2.5 | 0.281744 | 0.282062 |
| 8A | JBC2259-60 | 0.281387 | 0.000024  | 0.000663078 | 0.308626 | 1911 | A | 0.281363 | -7.3  | 0.9 | 2.6 | 3.0 | 0.281567 | 0.281858 |
| 8A | JBC2259-79 | 0.281261 | 0.000012  | 0.000499906 | 0.303657 | 2122 | A | 0.281241 | -6.8  | 0.4 | 2.7 | 3.2 | 0.281432 | 0.281701 |
| 8A | JBC2259-53 | 0.281409 | 0.000019  | 0.00117275  | 0.327953 | 2242 | A | 0.281359 | 0.2   | 0.7 | 2.6 | 2.8 | 0.281354 | 0.281611 |
| 8A | JBC2259-30 | 0.281325 | 0.0000085 | 0.000996114 | 0.328153 | 2369 | A | 0.281280 | 0.3   | 0.3 | 2.7 | 2.9 | 0.281272 | 0.281516 |
| 8A | JBC2259-70 | 0.281282 | 0.000021  | 0.00106358  | 0.321369 | 2394 | A | 0.281233 | -0.8  | 0.7 | 2.8 | 3.0 | 0.281256 | 0.281498 |
| 8A | JBC2259-15 | 0.281393 | 0.000016  | 0.000773845 | 0.311676 | 2571 | A | 0.281355 | 7.6   | 0.6 | 2.6 | 2.6 | 0.281141 | 0.281365 |
| 8A | JBC2259-18 | 0.280929 | 0.000022  | 0.000770591 | 0.313959 | 2700 |   | 0.280889 | -6.0  | 0.8 | 3.2 | 3.6 | 0.281057 | 0.281268 |

# Ciletuh Fm.

| Sample | Analysi    | 176Hf/ <sup>177</sup> Hf | 1 S.D.    | 176Lu/ <sup>177</sup> Hf | 176Yb/ <sup>177</sup> Hf | U/Pb AGE | Population | 176Hf/ <sup>177</sup> Hf <sub>i</sub> | εHf   | 1 σ | T <sub>DM</sub> (Ga) | T <sub>DM</sub> <sup>C</sup> | Hf Chur (t) | Hf DM (t) |
|--------|------------|--------------------------|-----------|--------------------------|--------------------------|----------|------------|---------------------------------------|-------|-----|----------------------|------------------------------|-------------|-----------|
| 28A*   | JBC2772_40 | 0.283093                 | 0.000013  | 0.000931115              | 0.029488                 | 68       |            | 0.283092                              | 12.8  | 0.5 | 0.2                  | 0.3                          | 0.282730    | 0.283202  |
| 28A*   | JBC2772_50 | 0.283032                 | 0.000013  | 0.00057998               | 0.0190692                | 69       |            | 0.283031                              | 10.7  | 0.5 | 0.3                  | 0.5                          | 0.282729    | 0.283201  |
| 28A*   | JBC2772_79 | 0.283104                 | 0.000015  | 0.000675019              | 0.0193274                | 70       |            | 0.283103                              | 13.3  | 0.5 | 0.2                  | 0.3                          | 0.282728    | 0.283201  |
| 28A    | JBC2772-45 | 0.282796                 | 0.000011  | 0.000880928              | 0.032118                 | 87       | H          | 0.282795                              | 2.7   | 0.4 | 0.6                  | 1.0                          | 0.282718    | 0.283189  |
| 28A*   | JBC2772_20 | 0.282478                 | 0.000012  | 0.000533757              | 0.0189026                | 87       | H          | 0.282477                              | -8.5  | 0.4 | 1.1                  | 1.7                          | 0.282718    | 0.283188  |
| 28A*   | JBC2772_68 | 0.282884                 | 0.000019  | 0.000876675              | 0.0281388                | 87       | H          | 0.282883                              | 5.8   | 0.7 | 0.5                  | 0.8                          | 0.282718    | 0.283188  |
| 28A*   | JBC2772_9  | 0.282489                 | 0.0000069 | 0.000778831              | 0.0297022                | 88       | H          | 0.282488                              | -8.1  | 0.2 | 1.1                  | 1.7                          | 0.282718    | 0.283188  |
| 28A*   | JBC2772_71 | 0.283035                 | 0.000016  | 0.00132814               | 0.0388893                | 88       | H          | 0.283033                              | 11.1  | 0.6 | 0.3                  | 0.4                          | 0.282718    | 0.283188  |
| 28A    | JBC2772-24 | 0.282554                 | 0.0000097 | 0.00196201               | 0.0695372                | 90       | H          | 0.282551                              | -5.9  | 0.3 | 1.0                  | 1.5                          | 0.282716    | 0.283187  |
| 28A    | JBC2772-58 | 0.282486                 | 0.0000085 | 0.00143152               | 0.0511438                | 90       | H          | 0.282484                              | -8.2  | 0.3 | 1.1                  | 1.7                          | 0.282716    | 0.283186  |
| 28A*   | JBC2772_29 | 0.282775                 | 0.000017  | 0.000892616              | 0.0271948                | 92       | H          | 0.282773                              | 2.1   | 0.6 | 0.7                  | 1.0                          | 0.282715    | 0.283185  |
| 28A*   | JBC2772_63 | 0.283015                 | 0.00002   | 0.00154092               | 0.053859                 | 95       | H          | 0.283012                              | 10.6  | 0.7 | 0.3                  | 0.5                          | 0.282713    | 0.283183  |
| 28A    | JBC2772-77 | 0.282637                 | 0.000009  | 0.00128817               | 0.047227                 | 224      | E          | 0.282632                              | -0.1  | 0.3 | 0.9                  | 1.3                          | 0.282633    | 0.283091  |
| 28A    | JBC2772-66 | 0.282794                 | 0.0000081 | 0.00127056               | 0.0470627                | 254      | E          | 0.282788                              | 6.2   | 0.3 | 0.7                  | 0.9                          | 0.282614    | 0.283068  |
| 28A    | JBC2772-76 | 0.282412                 | 0.000012  | 0.00114761               | 0.0450662                | 279      | E          | 0.282406                              | -6.8  | 0.4 | 1.2                  | 1.7                          | 0.282599    | 0.283050  |
| 28A    | JBC2772-35 | 0.282277                 | 0.0000075 | 0.00160912               | 0.0546539                | 291      | E          | 0.282268                              | -11.4 | 0.3 | 1.4                  | 2.0                          | 0.282592    | 0.283042  |
| 28A    | JBC2772-62 | 0.282618                 | 0.00001   | 0.00155791               | 0.0543038                | 327      | D          | 0.282608                              | 1.4   | 0.4 | 0.9                  | 1.3                          | 0.282569    | 0.283016  |
| 28A    | JBC2772-4  | 0.282646                 | 0.0000096 | 0.00085778               | 0.0338244                | 330      | D          | 0.282641                              | 2.6   | 0.3 | 0.9                  | 1.2                          | 0.282567    | 0.283014  |
| 28A    | JBC2772-52 | 0.282465                 | 0.0000079 | 0.000374892              | 0.0111905                | 373      | D          | 0.282462                              | -2.7  | 0.3 | 1.1                  | 1.6                          | 0.282540    | 0.282983  |
| 28A    | JBC2772-32 | 0.282479                 | 0.0000067 | 0.00107494               | 0.041768                 | 485      | C          | 0.282469                              | 0.0   | 0.2 | 1.1                  | 1.5                          | 0.282470    | 0.282902  |
| 28A    | JBC2772-72 | 0.282404                 | 0.00001   | 0.000652274              | 0.0273711                | 500      | C          | 0.282398                              | -2.2  | 0.4 | 1.2                  | 1.6                          | 0.282461    | 0.282891  |
| 28A    | JBC2772-34 | 0.282098                 | 0.0000062 | 0.000020367              | 0.000965302              | 543      | C          | 0.282098                              | -11.9 | 0.2 | 1.6                  | 2.3                          | 0.282434    | 0.282860  |
| 28A    | JBC2772-70 | 0.282292                 | 0.00001   | 0.000972568              | 0.0412881                | 545      | C          | 0.282282                              | -5.3  | 0.4 | 1.4                  | 1.9                          | 0.282433    | 0.282859  |
| 28A    | JBC2772-51 | 0.282274                 | 0.0000094 | 0.000512605              | 0.0207484                | 548      | C          | 0.282269                              | -5.7  | 0.3 | 1.4                  | 1.9                          | 0.282431    | 0.282856  |
| 28A    | JBC2772-54 | 0.282384                 | 0.0000076 | 3.82697E-05              | 0.00189607               | 553      | C          | 0.282384                              | -1.6  | 0.3 | 1.2                  | 1.6                          | 0.282428    | 0.282853  |

| 28A    | JBC2772-17  | 0.282237    | 0.0000083 | 3.07423E-05 | 0.0013078   | 557      | C          | 0.282237                 | -6.7  | 0.3 | 1.4                  | 1.9                          | 0.282425    | 0.282850  |
|--------|-------------|-------------|-----------|-------------|-------------|----------|------------|--------------------------|-------|-----|----------------------|------------------------------|-------------|-----------|
| 28A    | JBC2772-27  | 0.282365    | 0.0000079 | 2.36461E-05 | 0.00111213  | 586      | C          | 0.282365                 | -1.5  | 0.3 | 1.2                  | 1.6                          | 0.282407    | 0.282829  |
| 28A    | JBC2772-44  | 0.281747    | 0.0000093 | 0.00115798  | 0.0452865   | 587      | C          | 0.281734                 | -23.8 | 0.3 | 2.1                  | 3.0                          | 0.282406    | 0.282828  |
| 28A    | JBC2772-44A | 0.282571    | 0.0000078 | 0.000114264 | 0.00545055  | 587      | C          | 0.282570                 | 5.8   | 0.3 | 0.9                  | 1.2                          | 0.282406    | 0.282828  |
| 28A    | JBC2772-39  | 0.282028    | 0.0000072 | 7.14408E-05 | 0.00319578  | 595      | C          | 0.282027                 | -13.3 | 0.3 | 1.7                  | 2.4                          | 0.282401    | 0.282822  |
| 28A    | JBC2772-28  | 0.281763    | 0.000011  | 0.000817962 | 0.0348348   | 599      | C          | 0.281754                 | -22.8 | 0.4 | 2.1                  | 3.0                          | 0.282399    | 0.282820  |
| 28A    | JBC2772-37  | 0.282427    | 0.000012  | 0.000810457 | 0.0347048   | 616      | C          | 0.282418                 | 1.0   | 0.4 | 1.2                  | 1.5                          | 0.282389    | 0.282808  |
| 28A    | JBC2772-2   | 0.282444    | 0.0000081 | 0.000716434 | 0.0322287   | 637      | C          | 0.282435                 | 2.1   | 0.3 | 1.1                  | 1.4                          | 0.282375    | 0.282792  |
| 28A    | JBC2772-49  | 0.282441    | 0.0000097 | 0.00101783  | 0.0411495   | 649      | C          | 0.282429                 | 2.1   | 0.3 | 1.1                  | 1.5                          | 0.282368    | 0.282784  |
| 28A    | JBC2772-13  | 0.282507    | 0.000015  | 0.0027349   | 0.105603    | 653      | C          | 0.282473                 | 3.8   | 0.5 | 1.1                  | 1.4                          | 0.282365    | 0.282780  |
| 28A    | JBC2772-57  | 0.282523    | 0.0000072 | 0.000525086 | 0.0211226   | 671      |            | 0.282516                 | 5.8   | 0.3 | 1.0                  | 1.2                          | 0.282354    | 0.282767  |
| 28A    | JBC2772-10  | 0.282309    | 0.0000094 | 0.00107426  | 0.0455907   | 790      | B          | 0.282293                 | 0.5   | 0.3 | 1.3                  | 1.7                          | 0.282279    | 0.282681  |
| 28A    | JBC2772-6   | 0.282254    | 0.0000095 | 0.000373786 | 0.0166062   | 926      | B          | 0.282247                 | 1.9   | 0.3 | 1.4                  | 1.7                          | 0.282193    | 0.282582  |
| 28A    | JBC2772-65  | 0.282397    | 0.0000082 | 0.00059537  | 0.0236523   | 936      | B          | 0.282387                 | 7.0   | 0.3 | 1.2                  | 1.4                          | 0.282188    | 0.282575  |
| 28A    | JBC2772-18  | 0.282491    | 0.0000074 | 0.000767494 | 0.0292772   | 980      | B          | 0.282477                 | 11.2  | 0.3 | 1.1                  | 1.1                          | 0.282160    | 0.282543  |
| 28A    | JBC2772-73  | 0.282397    | 0.0000091 | 0.00111735  | 0.047746    | 987      | B          | 0.282376                 | 7.8   | 0.3 | 1.2                  | 1.4                          | 0.282155    | 0.282537  |
| 28A    | JBC2772-43  | 0.281757    | 0.0000088 | 0.000531145 | 0.0231562   | 1041     | B          | 0.281747                 | -13.3 | 0.3 | 2.1                  | 2.7                          | 0.282121    | 0.282498  |
| 28A    | JBC2772-41  | 0.282238    | 0.000011  | 0.000522885 | 0.0219141   | 1067     | B          | 0.282227                 | 4.4   | 0.4 | 1.4                  | 1.6                          | 0.282104    | 0.282479  |
| 28A    | JBC2772-69  | 0.28215     | 0.0000096 | 0.000799913 | 0.0343271   | 1103     | B          | 0.282133                 | 1.8   | 0.3 | 1.5                  | 1.8                          | 0.282082    | 0.282453  |
| 28A    | JBC2772-19  | 0.28215     | 0.00001   | 0.000701568 | 0.0271836   | 1150     | B          | 0.282135                 | 2.9   | 0.4 | 1.5                  | 1.8                          | 0.282052    | 0.282418  |
| 28A    | JBC2772-30  | 0.282058    | 0.0000062 | 0.000514128 | 0.0173592   | 1162     | B          | 0.282047                 | 0.1   | 0.2 | 1.7                  | 2.0                          | 0.282045    | 0.282410  |
| 28A    | JBC2772-64  | 0.282285    | 0.0000088 | 0.000716435 | 0.0282368   | 1163     | B          | 0.282269                 | 8.0   | 0.3 | 1.4                  | 1.5                          | 0.282044    | 0.282409  |
| 28A    | JBC2772-33  | 0.282241    | 0.0000095 | 0.000210338 | 0.0075106   | 1163     | B          | 0.282236                 | 6.8   | 0.3 | 1.4                  | 1.6                          | 0.282044    | 0.282409  |
| 28A    | JBC2772-26  | 0.281894    | 0.0000053 | 0.000432438 | 0.0142255   | 1392     |            | 0.281883                 | -0.6  | 0.2 | 1.9                  | 2.2                          | 0.281899    | 0.282241  |
| 28A    | JBC2772-5   | 0.281968    | 0.0000072 | 0.000645613 | 0.0256116   | 1403     |            | 0.281951                 | 2.1   | 0.3 | 1.8                  | 2.0                          | 0.281892    | 0.282233  |
| 28A    | JBC2772-14  | 0.281631    | 0.0000096 | 0.000782621 | 0.0292906   | 1731     | A          | 0.281605                 | -2.7  | 0.3 | 2.3                  | 2.6                          | 0.281683    | 0.281991  |
| 28A    | JBC2772-31  | 0.281542    | 0.0000098 | 0.00071691  | 0.0239095   | 1826     | A          | 0.281517                 | -3.7  | 0.3 | 2.4                  | 2.7                          | 0.281622    | 0.281921  |
| 28A    | JBC2772-3   | 0.281623    | 0.0000099 | 0.00110211  | 0.0499915   | 1858     | A          | 0.281584                 | -0.6  | 0.4 | 2.3                  | 2.6                          | 0.281601    | 0.281897  |
| 28A    | JBC2772-67  | 0.281395    | 0.0000073 | 0.000366715 | 0.015458    | 2002     | A          | 0.281381                 | -4.5  | 0.3 | 2.6                  | 2.9                          | 0.281509    | 0.281790  |
| 28A    | JBC2772-48  | 0.281027    | 0.00001   | 0.000513334 | 0.0199544   | 2392     | A          | 0.281004                 | -9.0  | 0.4 | 3.1                  | 3.5                          | 0.281258    | 0.281499  |
| Sample | Analysi     | 176Hf/177Hf | 1 S.D.    | 176Lu/177Hf | 176Yb/177Hf | U/Pb AGE | Population | 176Hf/177Hf <sub>i</sub> | εHf   | 1 σ | T <sub>DM</sub> (Ga) | T <sub>DM</sub> <sup>C</sup> | Hf Chur (t) | Hf DM (t) |
| 30A    | 3145CIL-39  | 0.283138    | 0.000011  | 0.00213332  | 0.0733205   | 56       |            | 0.283136                 | 14.1  | 0.4 | 0.2                  | 0.2                          | 0.282737    | 0.283211  |
| 30A    | 3541CIL-17  | 0.283099    | 0.000011  | 0.00155564  | 0.0525036   | 70       | H          | 0.283097                 | 13.0  | 0.4 | 0.2                  | 0.3                          | 0.282728    | 0.283201  |
| 30A    | 3145CIL-53  | 0.283063    | 0.000014  | 0.00128123  | 0.0403025   | 74       | H          | 0.283061                 | 11.8  | 0.5 | 0.3                  | 0.4                          | 0.282726    | 0.283198  |
| 30A    | 3541CIL-27  | 0.283104    | 0.0000086 | 0.0015425   | 0.0585919   | 74       | H          | 0.283102                 | 13.3  | 0.3 | 0.2                  | 0.3                          | 0.282726    | 0.283198  |
| 30A    | 3145CIL-64  | 0.283114    | 0.000016  | 0.0015471   | 0.0529194   | 82       | H          | 0.283112                 | 13.8  | 0.6 | 0.2                  | 0.3                          | 0.282721    | 0.283193  |
| 30A    | 3145CIL-52  | 0.282958    | 0.0000089 | 0.000932152 | 0.0334635   | 166      | F          | 0.282955                 | 10.1  | 0.3 | 0.4                  | 0.6                          | 0.282669    | 0.283132  |
| 30A    | 3145CIL-42  | 0.282776    | 0.0000088 | 0.00179927  | 0.0716679   | 193      | F          | 0.282770                 | 4.1   | 0.3 | 0.7                  | 1.0                          | 0.282653    | 0.283113  |
| 30A    | 3145CIL-37  | 0.282786    | 0.000021  | 0.00429624  | 0.192256    | 204      | E          | 0.282770                 | 4.4   | 0.7 | 0.7                  | 1.0                          | 0.282646    | 0.283105  |
| 30A    | 3541CIL-10  | 0.282744    | 0.000008  | 0.00142282  | 0.0601475   | 210      | E          | 0.282738                 | 3.4   | 0.3 | 0.7                  | 1.0                          | 0.282642    | 0.283101  |
| 30A    | 3145CIL-54  | 0.282799    | 0.0000095 | 0.00139856  | 0.0521629   | 212      | E          | 0.282793                 | 5.4   | 0.3 | 0.6                  | 0.9                          | 0.282640    | 0.283099  |
| 30A    | 3145CIL-30  | 0.282825    | 0.0000096 | 0.00115336  | 0.0451685   | 244      | E          | 0.282820                 | 7.0   | 0.3 | 0.6                  | 0.8                          | 0.282621    | 0.283076  |
| 30A    | 3145CIL-49  | 0.28289     | 0.000013  | 0.00106146  | 0.0409306   | 272      | E          | 0.282885                 | 10.0  | 0.5 | 0.5                  | 0.7                          | 0.282603    | 0.283056  |
| 30A    | 3145CIL-36  | 0.2828      | 0.000011  | 0.0018691   | 0.0774779   | 276      | E          | 0.282790                 | 6.7   | 0.4 | 0.7                  | 0.9                          | 0.282601    | 0.283053  |
| 30A    | 3145CIL-63  | 0.282772    | 0.000018  | 0.00173566  | 0.0698782   | 287      | E          | 0.282763                 | 6.0   | 0.6 | 0.7                  | 0.9                          | 0.282594    | 0.283045  |
| 30A    | 3145CIL-46  | 0.282376    | 0.00001   | 0.00111159  | 0.0417174   | 454      | C          | 0.282367                 | -4.4  | 0.4 | 1.2                  | 1.7                          | 0.282490    | 0.282925  |
| 30A    | 3541CIL-9   | 0.28228     | 0.000013  | 0.000548778 | 0.0262405   | 500      | C          | 0.282275                 | -6.6  | 0.5 | 1.4                  | 1.9                          | 0.282461    | 0.282891  |
| 30A    | 3541CIL-11  | 0.282333    | 0.00001   | 0.00125091  | 0.0511312   | 577      | C          | 0.282319                 | -3.3  | 0.4 | 1.3                  | 1.7                          | 0.282413    | 0.282836  |
| 30A    | 3145CIL-50  | 0.282692    | 0.000058  | 0.00100481  | 0.0405813   | 1143     | B          | 0.282670                 | 21.8  | 2.1 | 0.8                  | 0.6                          | 0.282056    | 0.282423  |
| 30A    | 3145CIL-61  | 0.28176     | 0.0000098 | 0.000661699 | 0.0280771   | 1582     |            | 0.281740                 | -1.3  | 0.3 | 2.1                  | 2.4                          | 0.281778    | 0.282101  |
| 30A    | 3145CIL-40  | 0.281318    | 0.0000075 | 0.00063741  | 0.0229137   | 2511     | A          | 0.281287                 | 3.8   | 0.3 | 2.7                  | 2.8                          | 0.281180    | 0.281410  |

28A\*analysed in April 2011 (UP266 laser)  
rejected analyses highlighted in grey
